# Supplementary material for: Improving Prediction of Eating-Related Behavioral Outcomes with Zero-Sensitive Regression Models
Source: PubMed Central journal article supplement — Appetite. Author manuscript; Available in PMC 2019 Oct 5. (PMC6778476; doi:10.1016/j.appet.2018.06.030), 2018-06-27
Supplement: NIHMS986798-supplement-1.pdf [file NIHMS986798-supplement-1.pdf]

**Supplementary Table 1.** Monte Carlo Estimation of Negative Binomial Variations with Two Predictors

| Monte Carlo Estimates without Missing Data                                   |        |          |       |        |          |       |        |          |       |
|------------------------------------------------------------------------------|--------|----------|-------|--------|----------|-------|--------|----------|-------|
| U1 on X1 [Population parameter set at .20, with binomial association of .30] |        |          |       |        |          |       |        |          |       |
|                                                                              | NBH    |          |       |        | NBI      |       |        | NB       |       |
| N = 100                                                                      | P Bias | Coverage | Power | P Bias | Coverage | Power | P Bias | Coverage | Power |
| 20% Zeros                                                                    | .062   | 93.5%    | 27.5% | -.012  | 90.5%    | 34.5% | .083   | 91.5%    | 38.0% |
| 50% Zeros                                                                    | .105   | 91.0%    | 21.5% | .165   | 89.0%    | 31.5% | .560   | 87.0%    | 42.0% |
| 80% Zeros                                                                    | -.156  | 81.5%    | 18.0% | .120   | 82.0%    | 25.5% | .856   | 92.0%    | 28.0% |
| N = 500                                                                      |        |          |       |        |          |       |        |          |       |
| 20% Zeros                                                                    | .014   | 94.0%    | 73.0% | -.006  | 95.5%    | 83.5% | .084   | 93.5%    | 89.5% |
| 50% Zeros                                                                    | .017   | 92.5%    | 52.0% | .139   | 91.5%    | 78.5% | .485   | 79.5%    | 94.5% |
| 80% Zeros                                                                    | -.099  | 90.5%    | 28.0% | .153   | 90.5%    | 43.5% | .627   | 79.5%    | 66.0% |
| N = 1000                                                                     |        |          |       |        |          |       |        |          |       |
| 20% Zeros                                                                    | -.007  | 95.5%    | 95.0% | -.021  | 95.0%    | 99.5% | .069   | 97.0%    | 99.5% |
| 50% Zeros                                                                    | -.010  | 94.5%    | 79.5% | .116   | 93.0%    | 95.5% | .462   | 56.5%    | 100%  |
| 80% Zeros                                                                    | -.050  | 91.0%    | 42.0% | .153   | 91.5%    | 68.5% | .614   | 74.0%    | 93.0% |
| U1 on X2 [Population parameter set at .40]                                   |        |          |       |        |          |       |        |          |       |
|                                                                              | NBH    |          |       |        | NBI      |       |        | NB       |       |
| N = 100                                                                      | P Bias | Coverage | Power | P Bias | Coverage | Power | P Bias | Coverage | Power |
| 20% Zeros                                                                    | -.079  | 88.5%    | 60.0% | -.304  | 90.5%    | 34.5% | -.312  | 80.0%    | 53.0% |
| 50% Zeros                                                                    | .089   | 88.0%    | 45.5% | -.325  | 81.5%    | 41.5% | -.393  | 81.5%    | 34.0% |
| 80% Zeros                                                                    | .195   | 82.0%    | 35.5% | -.315  | 75.0%    | 36.0% | -.620  | 81.5%    | 14.0% |
| N = 500                                                                      |        |          |       |        |          |       |        |          |       |
| 20% Zeros                                                                    | -.018  | 93.5%    | 99.5% | -.249  | 68.5%    | 98.5% | -.262  | 66.5%    | 98.5% |
| 50% Zeros                                                                    | .003   | 91.5%    | 95.0% | -.240  | 79.0%    | 92.5% | -.310  | 69.0%    | 88.0% |
| 80% Zeros                                                                    | .037   | 90.5%    | 74.5% | -.221  | 86.0%    | 70.0% | -.450  | 72.5%    | 39.5% |
| N = 1000                                                                     |        |          |       |        |          |       |        |          |       |
| 20% Zeros                                                                    | .003   | 94.5%    | 100%  | -.232  | 52.5%    | 100%  | -.244  | 46.5%    | 100%  |
| 50% Zeros                                                                    | .013   | 94.5%    | 100%  | -.217  | 71.0%    | 100%  | -.281  | 56.5%    | 100%  |
| 80% Zeros                                                                    | .017   | 90.5%    | 93.5% | -.197  | 85.5%    | 91.0% | -.402  | 66.0%    | 69.5% |
| Monte Carlo Estimates with 20% Missing Data                                  |        |          |       |        |          |       |        |          |       |
| U1 on X1 [Population parameter set at .20, with binomial association of .30] |        |          |       |        |          |       |        |          |       |
|                                                                              | NBH    |          |       |        | NBI      |       |        | NB       |       |
| N = 100                                                                      | P Bias | Coverage | Power | P Bias | Coverage | Power | P Bias | Coverage | Power |
| 20% Zeros                                                                    | .016   | 90.5%    | 19.5% | -.027  | 90.5%    | 25.5% | .082   | 92.0%    | 32.0% |
| 50% Zeros                                                                    | -.002  | 87.0%    | 18.5% | .128   | 87.0%    | 27.5% | .595   | 88.0%    | 35.5% |
| 80% Zeros                                                                    | -.255  | 82.5%    | 22.0% | .043   | 77.5%    | 29.5% | .635   | 77.0%    | 84.5% |
| N = 500                                                                      |        |          |       |        |          |       |        |          |       |
| 20% Zeros                                                                    | .048   | 93.0%    | 65.0% | .016   | 95.0%    | 75.5% | .105   | 94.0%    | 82.5% |
| 50% Zeros                                                                    | .090   | 91.0%    | 50.5% | .186   | 92.0%    | 69.5% | .526   | 76.5%    | 88.0% |

|                                                   |        |            |       |        |            |       |        |           |       |  |
|---------------------------------------------------|--------|------------|-------|--------|------------|-------|--------|-----------|-------|--|
| 80% Zeros                                         | .099   | 90.5%      | 31.0% | .030   | 89.0%      | 51.0% | .724   | 80.5%     | 63.0% |  |
| <b>N = 1000</b>                                   |        |            |       |        |            |       |        |           |       |  |
| 20% Zeros                                         | -.011  | 93.0%      | 87.5% | -.023  | 93.5%      | 97.0% | .068   | 93.0%     | 98.0% |  |
| 50% Zeros                                         | .005   | 93.0%      | 72.5% | .119   | 90.5%      | 91.5% | .462   | 75.0%     | 98.5% |  |
| 80% Zeros                                         | .023   | 92.5%      | 47.0% | .195   | 91.0%      | 65.0% | .635   | 77.0%     | 84.5% |  |
| <b>U1 on X2 [Population parameter set at .40]</b> |        |            |       |        |            |       |        |           |       |  |
|                                                   |        | <b>NBH</b> |       |        | <b>NBI</b> |       |        | <b>NB</b> |       |  |
| <b>N = 100</b>                                    | P Bias | Coverage   | Power | P Bias | Coverage   | Power | P Bias | Coverage  | Power |  |
| 20% Zeros                                         | .006   | 88.5%      | 59.0% | -.257  | 86.5%      | 52.0% | -.272  | 84.5%     | 48.5% |  |
| 50% Zeros                                         | .033   | 86.0%      | 47.5% | -.245  | 84.5%      | 42.0% | -.328  | 87.5%     | 34.5% |  |
| 80% Zeros                                         | .176   | 81.5%      | 34.0% | -.245  | 79.0%      | 33.5% | -.409  | 69.0%     | 61.0% |  |
| <b>N = 500</b>                                    |        |            |       |        |            |       |        |           |       |  |
| 20% Zeros                                         | .009   | 94.5%      | 99.5% | -.271  | 77.5%      | 98.5% | -.242  | 75.5%     | 97.5% |  |
| 50% Zeros                                         | .010   | 93.0%      | 93.0% | -.216  | 82.0%      | 88.5% | -.280  | 79.0%     | 87.5% |  |
| 80% Zeros                                         | .003   | 94.5%      | 65.5% | -.208  | 89.0%      | 61.5% | -.414  | 84.5%     | 38.0% |  |
| <b>N = 1000</b>                                   |        |            |       |        |            |       |        |           |       |  |
| 20% Zeros                                         | .003   | 95.5%      | 100%  | -.234  | 55.0%      | 100%  | -.247  | 51.5%     | 100%  |  |
| 50% Zeros                                         | .001   | 93.0%      | 100%  | -.221  | 73.5%      | 99.5% | -.284  | 61.0%     | 99.0% |  |
| 80% Zeros                                         | .002   | 94.0%      | 90.5% | -.209  | 84.0%      | 83.0% | -.409  | 69.0%     | 61.0% |  |

Note: P Bias = Parameter Bias. Coverage = the proportion of replications for which the 95% confidence interval includes the parameter value. Power = the proportion of replication for which the null hypothesis that a parameter is equal to zero is rejected at the .05 level. NBH = Negative binomial hurdle model. NBI = Negative binomial inflated model (non-hurdle). NB = negative binomial model (without zero inflation). Two predictors included in modeling population parameters. The population was modeled on a zero-inflated, negative binomial hurdle model, with a first predictor (X1) set to an association of .30 with the binomial portion of the model and .20 with the count portion of the model. The second predictor (X2) was set to an association of .40 with the count portion of the model and 0 on the binomial portion of the model. X1 and X2 were set to covary at .20.

## SUPPLEMENTAL INFORMATION. EXAMPLE SYNTAX

Title: Monte Carlo Analysis of data created with negative binomial hurdle model. Sample size = 100; 0% missing Data, 20% zero scores on the DV

```
MONTECARLO:                #this command describes details of the simulation study#
NAMES ARE u1 x1 x2;        #assign names to the variables in the generated dataset#
NOBSERVATIONS = 100;      #specify sample size for data generation and analysis #
NREPS = 200;              #specify the # of replications #
SEED = 459876;            #specifies the seed to be used for the random draws (random number) #
GENERATE = u1(nbh);        # specifies the scale of the dependent variable for data generation#
COUNT = u1(nbh);         #specifies u1 as a count variable#
REPSAVE = ALL;            #saves replications (for later analysis with NB and NBI models)#
SAVE = NBH.100.0M.20Z.rep*.dat #Identifies file names to save data#
```

```
model POPULATION:          #provides population parameter values to be used in data generation #
[x1-x2@0];                 #defines IV means#
x1-x2@1;                  #defines IV variances#
x1 with x2*.2;            #defines covariance between IVs#
u1 ON x1*.2;              #defines the population parameter u1 on X1#
u1 ON x2*.4;              #defines the population parameter u1 on X2
[u1@1];                   #defines intercept of DV#
U1@3;                     #defines dispersion of DV#
[u1#1@-1.386];           #defines the percentage of zero values [-1.386 = 20% zeros]#
u1#1 on x1@-.3;          #defines parameter between likelihood of being a zero value and X1.#
```

```
model:                     #specifies the model to test – for this model, same as population#
[x1-x2@0];
x1-x2@1;
x1 with x2*.2;
u1 ON x1*.2;
u1 ON x2*.4;
[u1@1];
U1@3;
[u1#1@-1.386];
u1#1 on x1@-.3;
```
